# Supplementary material for: Chick embryo chorioallantoic membrane (CAM): an alternative predictive model in acute toxicological studies for anti-cancer drugs
Source: PubMed Central journal article supplement — Exp Anim. 2015 Jan 22;64(2):129–38. doi: 10.1538/expanim.14-0059 (PMC4427727; doi:10.1538/expanim.14-0059), 2015-01-22
Supplement: expanim-64-129-s001.pdf [file expanim-64-129-s001.pdf]

Supplementary Table 1: Ideal LD<sub>50</sub> values (mg/kg) for FDA-approved anticancer drugs in the CA

| Drugs            | CAM (IV administration)     |                             |                                   |
|------------------|-----------------------------|-----------------------------|-----------------------------------|
|                  | LD <sub>50</sub><br>(mg/kg) | SD <sub>50</sub><br>(mg/kg) | Ideal LD <sub>50</sub><br>(mg/kg) |
| Cyclophosphamide | 2.079                       | 1.49                        | 1.79                              |
| Cisplatin        | 0.242                       | 0.178                       | 0.21                              |
| Vincristine      | 0.0029                      | 0.017                       | 0.01                              |
| Carmustine       | 0.758                       | 0.382                       | 0.57                              |
| Camptothecin     | 0.17                        | 0.103                       | 0.14                              |
| Aloin            | 1.36                        | 0.56                        | 0.96                              |
| Mitomycin-C      | 0.15                        | 0.38                        | 0.26                              |
| Actinomycin-D    | 0.00003                     | 0.000025                    | 0.000028                          |
| Melphalan        | 0.18                        | 0.1                         | 0.14                              |
| Paclitaxel       | 0.054                       | 0.026                       | 0.04                              |

Example of the LD<sub>50</sub> calculation for cyclophosphamide:

$$A = (50\% - 14.3\%) / (69.2\% - 14.3\%) = 0.6503$$

$$B = \log (125 / 40) = 0.4949$$

$$\text{LD}_{50} / \text{embryo} = \log^{-1} [1.6 + (0.6503 \times 0.4949)] = 83.52 \mu\text{g} / \text{embryo}$$

$$\text{LD}_{50} (\text{mg/kg}) = 83.52 \times 25 = 2.08 \text{ mg / kg}$$

Example of the SD<sub>50</sub> calculation for cyclophosphamide:

$$A = (50\% - 30.8\%) / (85.7\% - 30.8\%) = 0.3497$$

$$B = \log (125 / 40) = 0.4949$$

$$\text{SD}_{50} / \text{embryo} = \log^{-1} [1.6 + (0.3497 \times 0.4949)] = 59.29 \mu\text{g} / \text{embryo}$$

$$\text{SD}_{50} (\text{mg/kg}) = 59.29 \times 25 = 1.49 \text{ mg / kg}$$

$$\text{Ideal CAM LD}_{50} \text{ for cyclophosphamide} = (2.08 + 1.49) / 2 = 1.79 \text{ mg/kg}$$

LM
